# Supplementary material
Source: PubMed Central journal article supplement (PMC6364095)
Supplement: NIHMS999966-supplement-supplemental.pdf [file NIHMS999966-supplement-supplemental.pdf]

# CHEMBIOCHEM

## Supporting Information

© Copyright Wiley-VCH Verlag GmbH & Co. KGaA, 69451 Weinheim, 2011

### **A Synthetic Mirror Image of Kalata B1 Reveals that Cyclotide Activity Is Independent of a Protein Receptor**

Lillian Sando,<sup>[a]</sup> Sónia Troeira Henriques,<sup>[a, b]</sup> Fiona Foley,<sup>[a]</sup> Shane M. Simonsen,<sup>[a]</sup> Norelle L. Daly,<sup>[a]</sup> Kristopher N. Hall,<sup>[c]</sup> Kirk R. Gustafson,<sup>[d]</sup> Marie-Isabel Aguilar,<sup>[c]</sup> and David J. Craik<sup>\*[a]</sup>

cbic\_201100450\_sm\_miscellaneous\_information.pdf

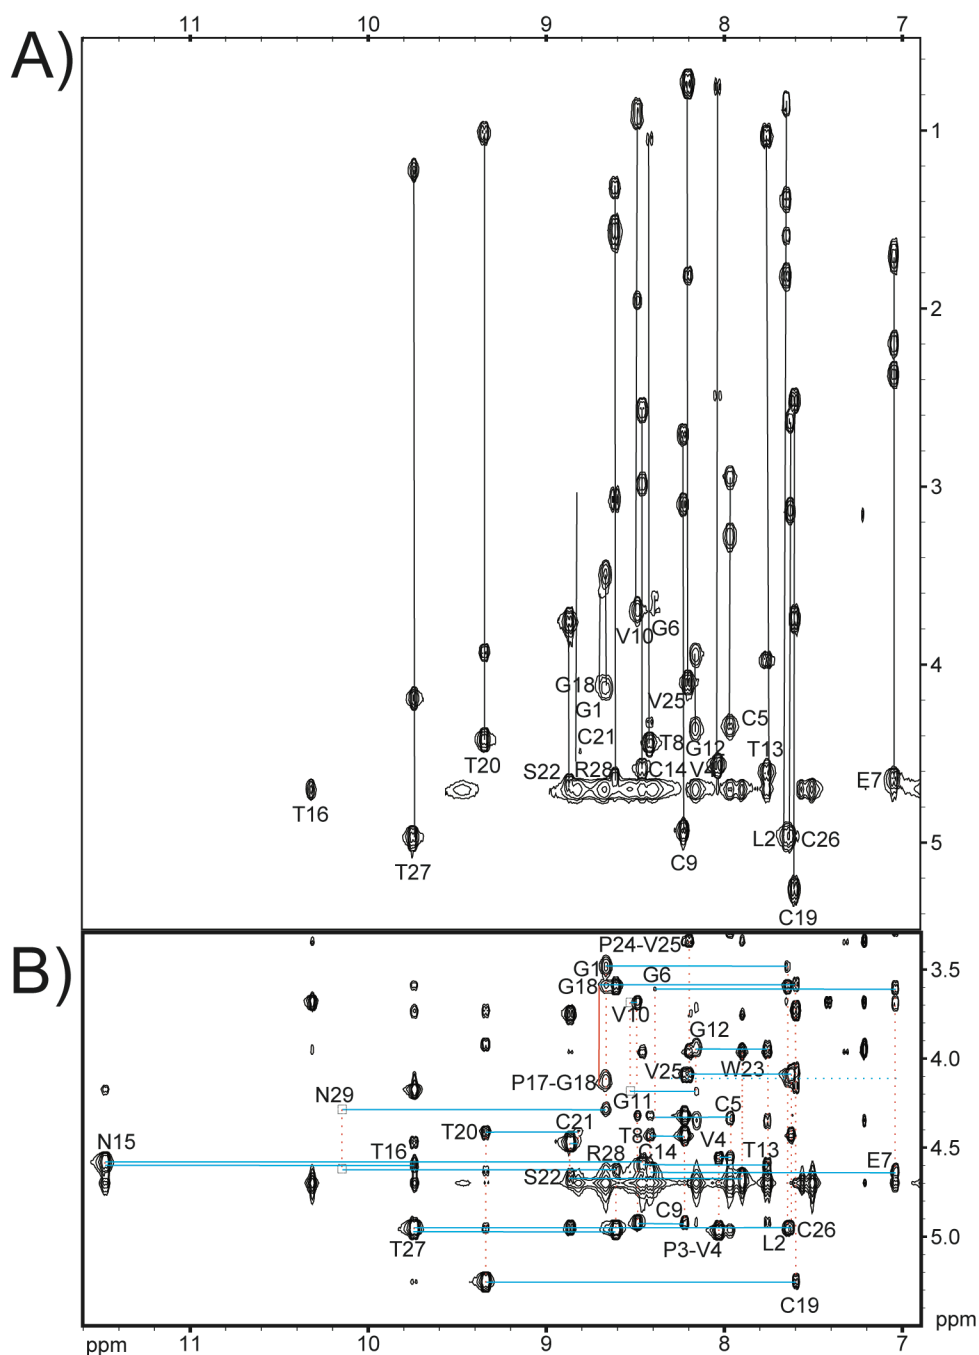

**Figure S.1.** Two-dimensional  $^1\text{H}$  NMR spectra of D-kalata B1 (500 MHz, 298 K, pH 5.2, 95%  $\text{H}_2\text{O}$  / 5%  $\text{D}_2\text{O}$ ). A) TOCSY spectrum with spin systems identified. Resonances for Gly<sup>11</sup>, Asn<sup>15</sup> and Asn<sup>29</sup> are absent from this display due to exchange broadening but were identified at lower pH. Trp<sup>23</sup> was absent from the TOCSY spectra but could be identified by NOESY. B) Fingerprint region of NOESY spectrum with intra-residual  $\text{H}\alpha$ -HN crosspeaks labelled with residue numbers, red and blue lines corresponding to intra and inter-residual steps respectively illustrate the sequential walk, which is used to link the spin systems together during the assignment process. The sequential connectivity pattern is broken at the Pro residues, Gly<sup>11</sup> and Asn<sup>29</sup>. Crosspeaks for the latter two were observed in spectra recorded under other solution conditions and are indicated by boxes.

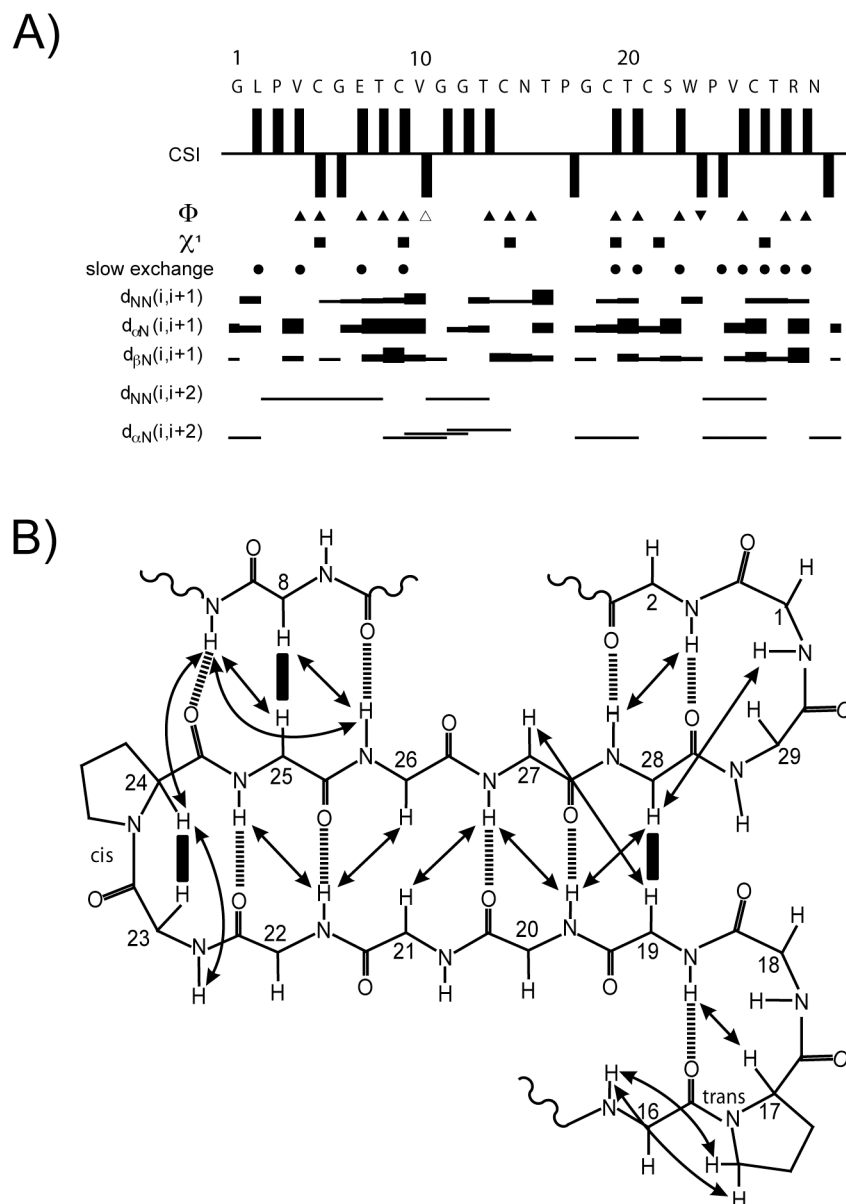

**Figure S.2.** Schematic representations of spectral data and secondary structure for D-kalata B1. A) Summary of the sequential and medium range NOE connectivities for D-kalata B1. The chemical shift index (CSI) for each residue is shown as a bar plot, with values of  $\pm 1$  indicating a shift deviation from random coil values of  $> 0.1$  ppm. The  $^3J_{\text{HN-H}\alpha}$  coupling constants above 8 Hz and below 6 Hz are shown as filled triangles pointing upward or downward, respectively. The  $\phi$  angle restraint of  $100^\circ \pm 80^\circ$  for Val<sup>10</sup> is represented as an open triangle. Residues with  $\chi_1$  angle restraints are shown as filled bars, slowly exchanging amide protons as filled circles and sequential and medium-range NOEs shown with heights corresponding to the relative NOE intensities. B) Schematic diagram of the secondary structure of D-kalata B1 showing the inter-strand NOE (solid lines) and potential hydrogen bonds (dashed lines). Inter-residual HN-HN, H $\alpha$ -HN and H $\alpha$ -H $\alpha$  NOEs are shown with arrows. For clarity, sequential NOEs are omitted. The  $\alpha$ -carbon atoms are labelled according to their residue numbers. The peptide bonds between the proline residues and their preceding residues are denoted as either *cis* or *trans*. The hydrogen bonds were inferred from slow exchange data and preliminary structure calculations.

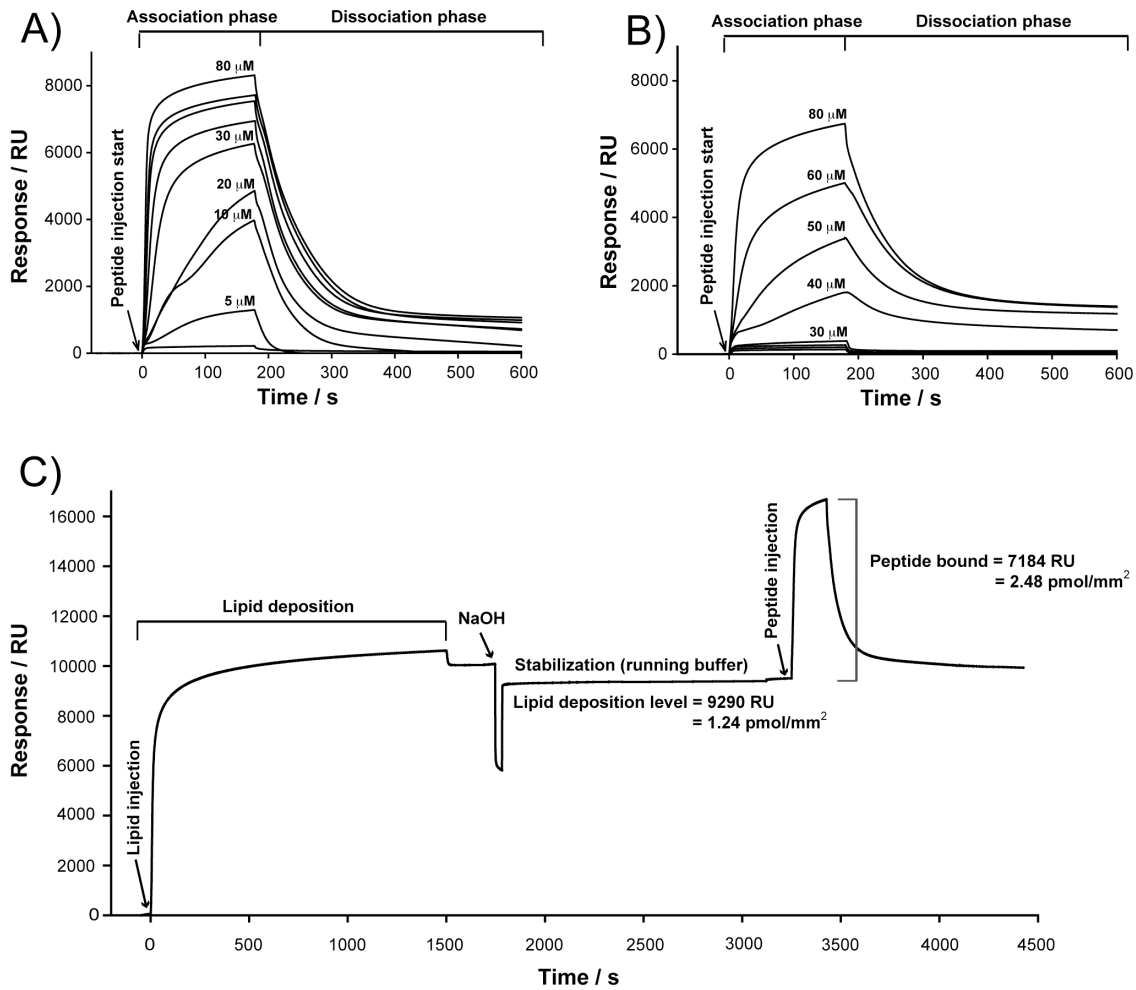

**Figure S.3.** Membrane binding of native kalata B1 and D-kalata B1 analysed by surface plasmon resonance. A) Native kalata B1 and B) D-kalata B1 were injected during 180 s (association phase) over POPC/POPE (4:1) lipid surfaces deposited on a L1 chip. Dissociation of the peptide from the membrane was followed for 600 s (dissociation phase). Different concentrations of peptide were injected (0, 5, 10, 20, 30, 40, 50, 60, 80  $\mu\text{M}$ ), and selected sensorgrams are labelled to assist with identification. C) Deposition of membrane vesicles composed of POPC/POPE (4:1) in the L1 chip (2  $\mu\text{L}/\text{min}$ , 25 min). 20 mM NaOH solution was injected after the lipid deposition to remove loosely bound vesicles. The peptide was injected over the lipid surface during 180 s (here exemplified with 50  $\mu\text{M}$  75% L / 25% D-kalata B1 mixture) and peptide dissociation was followed for 600 s. Peptide/lipid ratio at the end of peptide association phase can be determined by converting the response units (RU) into moles of peptide and lipid (1 RU  $\sim$  1pg/ $\text{mm}^2$  of lipid or peptide).  $M_w$  POPC/POPE (4:1)  $\sim$  752;  $M_w$  kalata B1 = 2892.33.

**Table S.1.**  $^1\text{H}$  Chemical shifts (ppm) of D-kalata B1 at pH 5.2 and 298 K.

| Residue                 | HN     | H $\alpha$   | H $\beta$     | Others                                                                                                                     |
|-------------------------|--------|--------------|---------------|----------------------------------------------------------------------------------------------------------------------------|
| Gly <sup>1</sup>        | 8.667  | 4.14, 3.487  | -             |                                                                                                                            |
| Leu <sup>2</sup>        | 7.649  | 4.962        | 1.812, 1.592  | H $\gamma$ 1.384, H $\delta_1$ * 0.881, H $\delta_2$ * 0.808                                                               |
| Pro <sup>3</sup>        | -      | 4.964        | 2.353, 1.627  | H $\delta$ * 3.667, H $\gamma$ 2.054, 1.946                                                                                |
| Val <sup>4</sup>        | 8.035  | 4.559        | 2.486         | H $\gamma_1$ * 0.774, H $\gamma_2$ * 0.73                                                                                  |
| Cys <sup>5</sup> (I)    | 7.966  | 4.342        | 3.271, 2.94   |                                                                                                                            |
| Gly <sup>6</sup>        | 8.38   | 3.697, 3.606 | -             |                                                                                                                            |
| Glu <sup>7</sup>        | 7.042  | 4.638        | 1.737, 1.675  | H $\gamma$ 2.361, 2.188                                                                                                    |
| Thr <sup>8</sup>        | 8.418  | 4.435        | 4.32          | H $\gamma_2$ * 1.035                                                                                                       |
| Cys <sup>9</sup> (II)   | 8.223  | 4.93         | 3.092, 2.701  |                                                                                                                            |
| Val <sup>10</sup>       | 8.486  | 3.689        | 1.958         | H $\gamma_1$ * 0.927, H $\gamma_2$ * 0.861                                                                                 |
| Gly <sup>11</sup>       | 8.549  | 4.187, 3.715 | -             |                                                                                                                            |
| Gly <sup>12</sup>       | 8.157  | 4.359, 3.954 | -             |                                                                                                                            |
| Thr <sup>13</sup>       | 7.758  | 4.602        | 3.972         | H $\gamma_2$ * 1.024                                                                                                       |
| Cys <sup>14</sup> (III) | 8.461  | 4.588        | 2.971, 2.558  |                                                                                                                            |
| Asn <sup>15</sup>       | 11.477 | 4.586        | 2.648, 2.648  | H $\delta_{21}$ 7.566, H $\delta_{22}$ 6.755                                                                               |
| Thr <sup>16</sup>       | 9.741  | 4.177        | 3.733         | H $\gamma_2$ * 1.213                                                                                                       |
| Pro <sup>17</sup>       | -      | 4.141        | 2.212, 1.795  | H $\delta$ 4.108, 3.593, H $\gamma$ 2.033, 1.899                                                                           |
| Gly <sup>18</sup>       | 8.695  | 4.095, 3.592 | -             |                                                                                                                            |
| Cys <sup>19</sup> (IV)  | 7.6    | 5.257        | 3.736, 2.512  |                                                                                                                            |
| Thr <sup>20</sup>       | 9.342  | 4.418        | 3.932         | H $\gamma_2$ * 1.009                                                                                                       |
| Cys <sup>21</sup> (V)   | 8.818  | 4.474        | 2.979, 2.676  |                                                                                                                            |
| Ser <sup>22</sup>       | 8.866  | 4.667        | 3.753, 3.753  |                                                                                                                            |
| Trp <sup>23</sup>       | 7.898  | 3.965        | 3.148, 3.148  | H $\delta_1$ 7.214, H $\epsilon_1$ 10.315, H $\epsilon_3$ 7.318,<br>H $\eta_2$ 7.115, H $\zeta_2$ 7.417, H $\zeta_3$ 7.005 |
| Pro <sup>24</sup>       | -      | 3.346        | 1.591, -0.405 | H $\delta$ 3.095, 3.095, H $\gamma$ 1.233, 1.16                                                                            |
| Val <sup>25</sup>       | 8.2    | 4.089        | 1.816         | H $\gamma_1$ * 0.765, H $\gamma_2$ * 0.716                                                                                 |
| Cys <sup>26</sup> (VI)  | 7.626  | 4.948        | 3.127, 2.622  |                                                                                                                            |
| Thr <sup>27</sup>       | 9.742  | 4.963        | 3.589         | H $\gamma_2$ * 0.766                                                                                                       |
| Arg <sup>28</sup>       | 8.612  | 4.641        | 1.607, 1.551  | H $\delta$ 3.093, 3.061, H $\gamma$ * 1.318                                                                                |
| Asn <sup>29</sup>       | -      | 4.292        | 2.979, 2.735  | H $\delta_{21}$ 7.502, H $\delta_{22}$ 6.857                                                                               |

**Table S.2.** NMR and refinement statistics for D-kalata B1

|                                             | Protein        |
|---------------------------------------------|----------------|
| <b>NMR distance and dihedral restraints</b> |                |
| Distance constraints                        |                |
| Total NOE                                   | 265            |
| Intra-residue                               | 0              |
| Inter-residue                               | 265            |
| Sequential ( $ i - j  = 1$ )                | 109            |
| Medium-range ( $ i - j  \leq 4$ )           | 56             |
| Long-range ( $ i - j  \geq 5$ )             | 100            |
| Intermolecular                              | 0              |
| Hydrogen bonds                              | 10             |
| Total dihedral angle restraints             |                |
| $\phi$                                      | 15             |
| $\chi_1$                                    | 9              |
| <b>Structure statistics</b>                 |                |
| Violations (mean and s.d.)                  |                |
| Distance restraints (Å)                     | 0.038 ± 0.002  |
| Dihedral angle restraints (°)               | 0.44 ± 0.13    |
| Max. dihedral angle violation (°)           | 2.5            |
| Max. distance restraint violation (Å)       | 0.3            |
| Deviations from idealized geometry          |                |
| Bond lengths (Å)                            | 0.005 ± 0.0002 |
| Bond angles (°)                             | 0.67 ± 0.03    |
| Improper (°)                                | 0.67 ± 0.026   |
| Average pairwise r.m.s. deviation** (Å)     |                |
| Backbone                                    | 0.36 ± 0.10    |
| Heavy                                       | 0.94 ± 0.19    |

\*\* Pairwise r.m.s. deviation was calculated among 20 refined structures.
